# Supplementary material
Source: PubMed Central journal article supplement (PMC2448836)
Supplement: 0802315105_Supplemental_PDF.pdf [file 0802315105_Supplemental_PDF.pdf]

# Supporting Information

Gilbert *et al.* 10.1073/pnas.0802315105

## SI Text: Amino Acid Differences Between the M1 and M25 mtDNA Genomes

Sequence data from 13 mammoth mitochondrial proteins showed between 1 and 5 sequence differences between individuals M1 and M25 (one case, *ND4*, showed a C-terminal insertion of five residues). In all cases, the substitutions were conservative. That is, all involve substitutions within the set of hydrophobic residues, extended to include Thr and Ser, except for one: an Asn-Asp change in *ND4*. It was possible to predict structures for four of the proteins by homology modeling techniques [using SWISS-MODEL (1, 2)]. Table S3 shows the details of these calculations. The sequence similarities between parent and target molecules were all at least 78% residue identity, suggesting that the quality of the models should be quite high. (All four parent structures were bovine homologues.)

Pictures of the modeled structures show that the sites of mutation are on the surface. Fig. S2 shows the sites of mutation in the structures for *Cytb* and *COX1*.

**Comparison with Elephant Sequences.** Alignment of *COX1* and *Cytb* sequences between the two mammoth individuals and two of the extant elephant species showed alignments with no insertions or deletions. The sets of sequences are very similar, with almost all

positions constant. When judging only from the *COX1* and *Cytb* protein sequences, the data suggest that mammoths are more closely related to African rather than Asian elephants. In this regard, we find 7 out of 16 sequence differences in *Cytb* and 3 out of 7 in *COX1*, at which the two mammoths and *L. africana* have a common residue but *E. maximus* has a different one. However, at position 371 of the *Cytb* alignment, both mammoths and *E. maximus* have Met, and *L. africana* has Val.

The alignments are shown in Fig. S3. At position 14 of the *CYTB* alignment, M25 has the same residue as the extant elephants, different from M1. At positions 159 and 238 of the *CYTB* alignment, both mammoths have the same residue (159 Asp, 238 Phe), and both extant elephants have the same residue (159 Asn, 238 Leu); a similar distribution appears at residues 329, 330, and 334. At position 303 of the *Cytb* alignment, M25 and M1 have different residues (Ile and Met, respectively), whereas the two extant elephants have Leu. At position 345, M1 and *L. africana* have Tyr but M25 and *E. maximus* have His.

The four *COX1* sequences are very similar until near the C terminus, where the extant elephants have a C-terminal extension.

**Conclusion.** There is no reason to suggest that any of the sequence changes is non-neutral.

1. Guex N, Peitsch M.C (1997) SWISS-MODEL and the Swiss-PdbViewer: An environment for comparative protein modelling. *Electrophoresis* 18:2714–2723.

2. Schwede T, Kopp J, Guex N, Peitsch PE (2003) SWISS-MODEL: An automated protein homology-modeling server. *Nucleic Acids Res* 31:3381–3385.



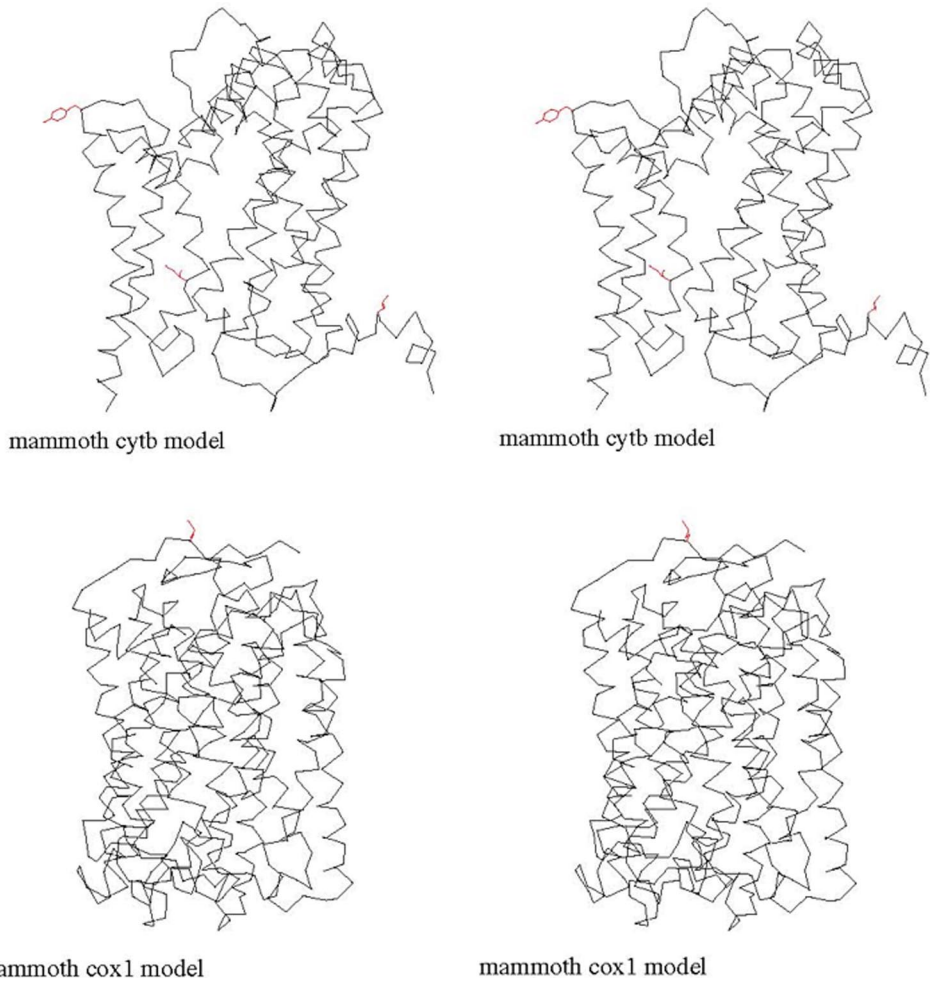

Fig. S2. Sites of mutation in the structures for Cytb and Cox1.

# Cytochrome b

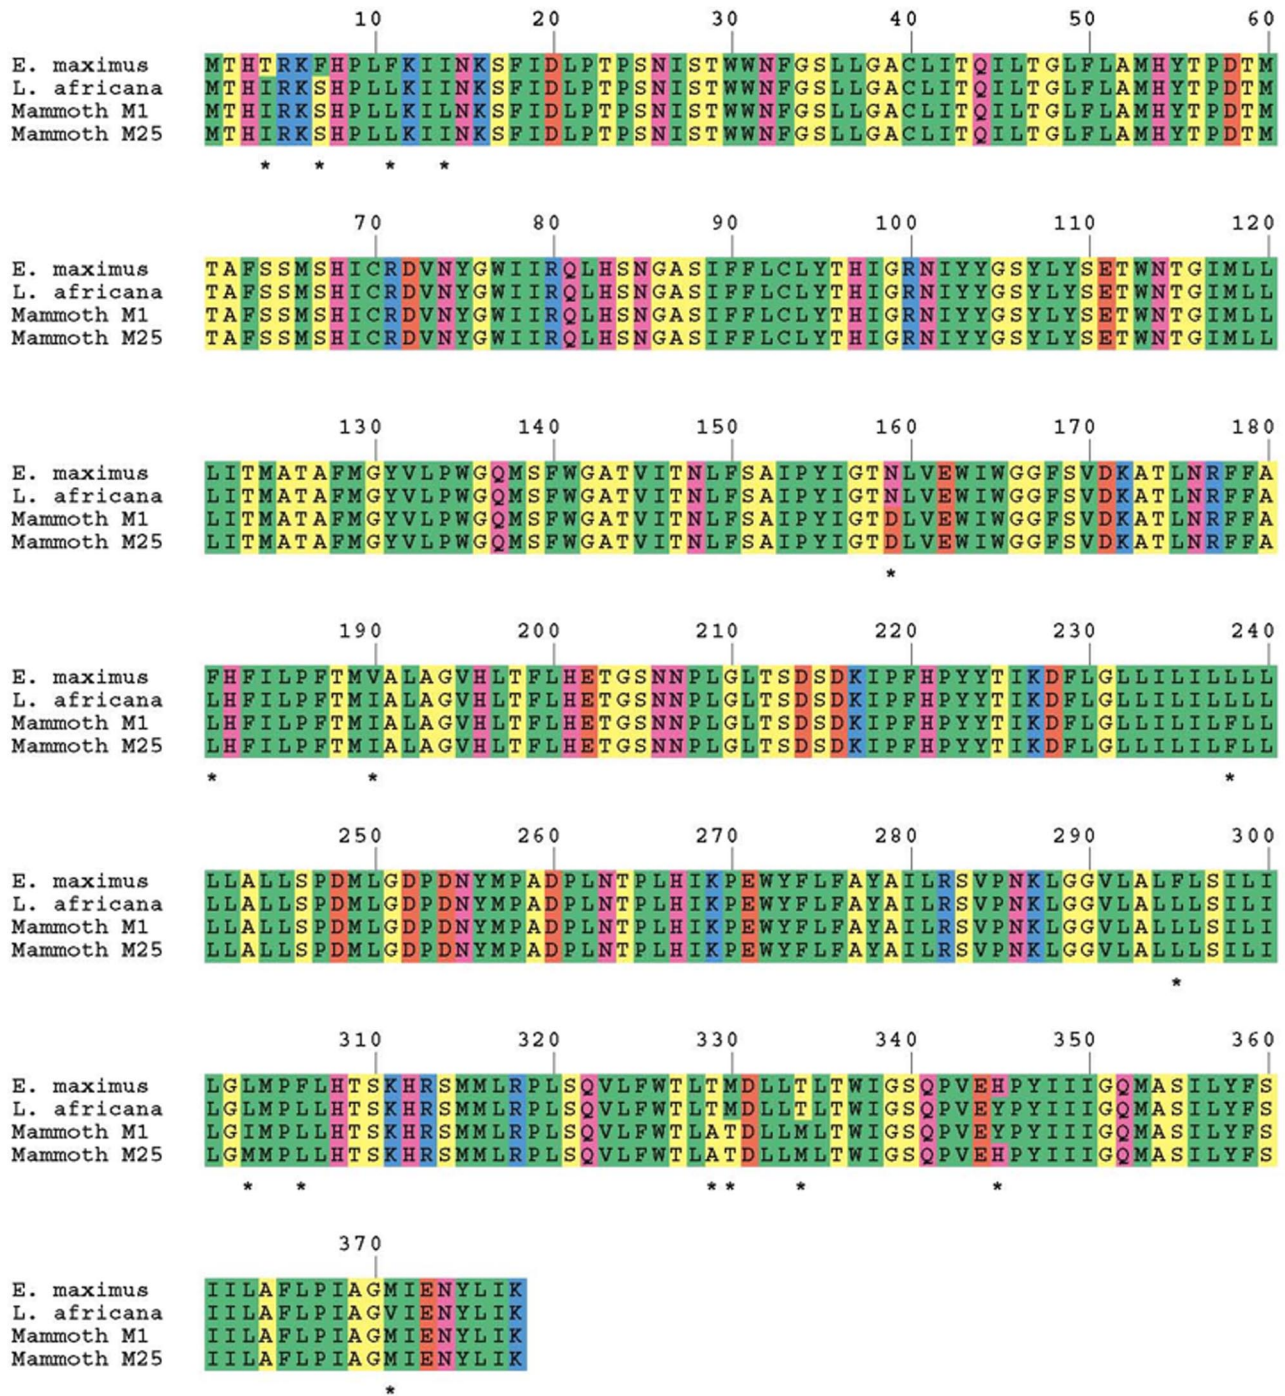

Fig. S3. (Figure continues on the next page.)



# COX1

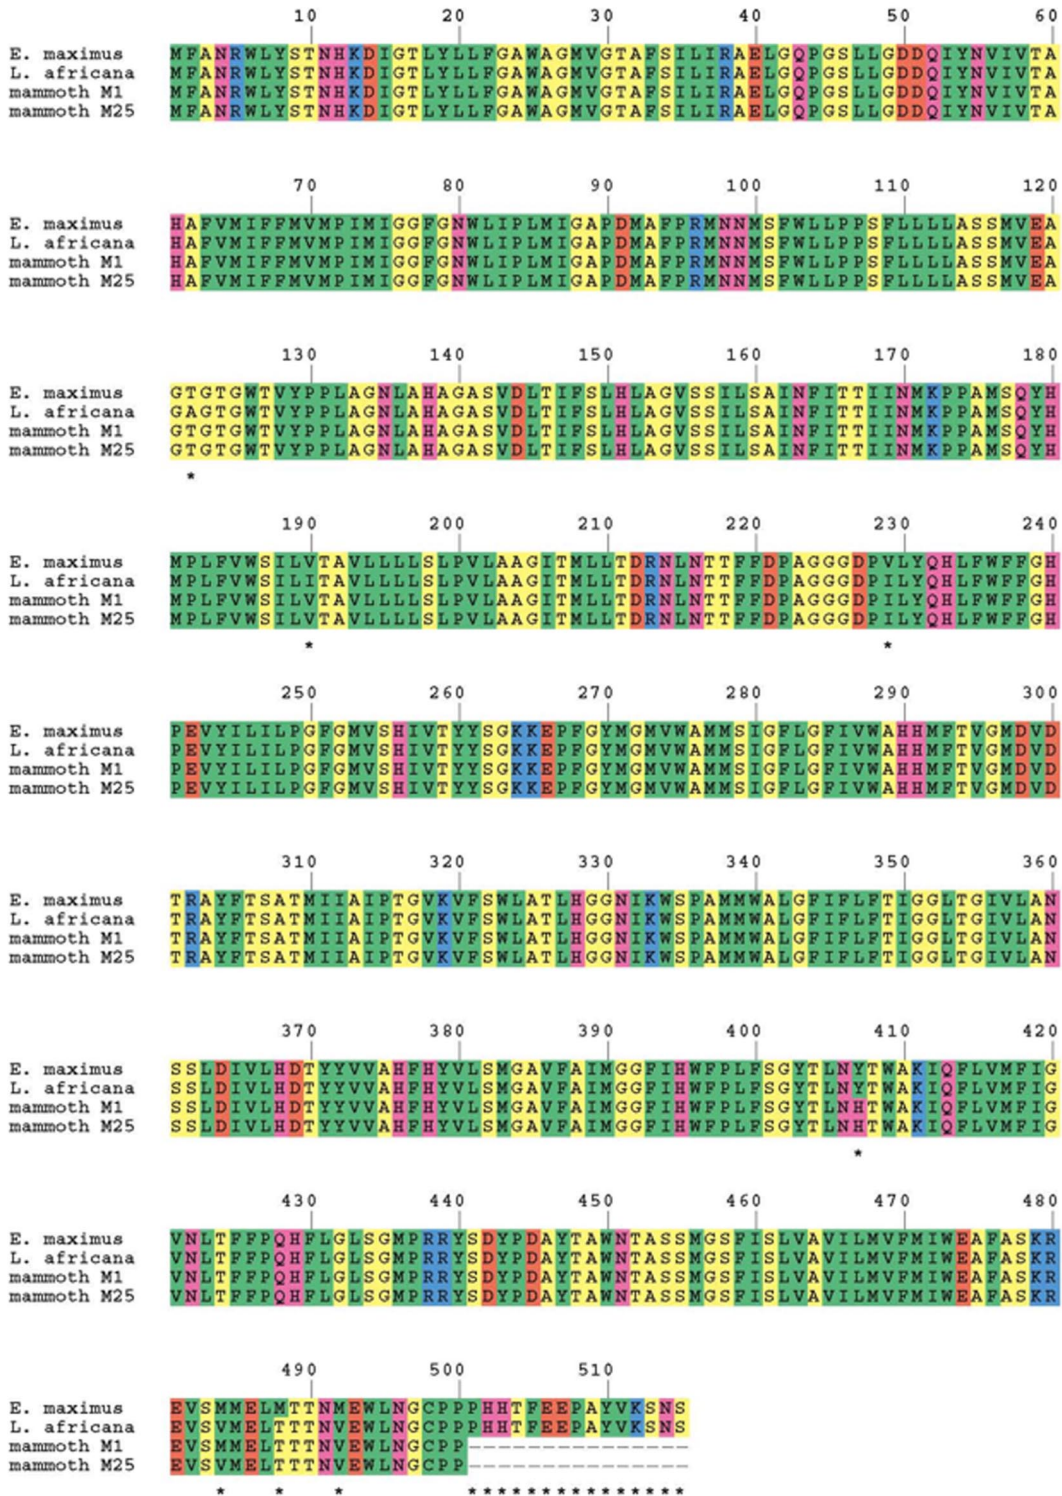

Fig. S3. Alignments of elephant and mammoth *Cytb* and COX1 sequences.

**Table S1. Sample details**

| Sample | Museum/<br>other ID | Geographic origin                     | Sample source                                           | Amount of<br>material<br>used, g | Size of<br>digestion, ml | GPS east   | GPS north | <sup>14</sup> C accession<br>no./source        | <sup>14</sup> C age | Collected by                | Collection year             | Sampled by    |
|--------|---------------------|---------------------------------------|---------------------------------------------------------|----------------------------------|--------------------------|------------|-----------|------------------------------------------------|---------------------|-----------------------------|-----------------------------|---------------|
| M15    | Site 5 (ref. 1)     | Ayon Island, Russia                   | Universita Degli<br>Studi Di Parma,<br>Italy            | 0.43                             | 15                       | 169        | 69.8      | OXA-19605                                      | 13,995 ± 55         | No information<br>available | No information<br>available | P. Iacuminn   |
| M19    | Yukagir<br>Mammoth  | Yukagir Village,<br>Yakutsk, Russia   | Zoological Institute,<br>Russian Academy<br>of Sciences | 0.6                              | 15                       | 140.34.873 | 71.52.988 | GrN-28258,<br>GrN-28259,<br>GrN-24288 (ref. 2) | 18,560 ± 50         | No information<br>available | 2003                        | A. Tikhonov   |
| M20    | LDR-P72             | Bolshoy Lyakhovskiy<br>Island, Russia | Lena Delta Reserve                                      | 0.35                             | 15                       | 142.89     | 73.64     | OXA-19608                                      | >63,500             | F. Selyakhov                | 2000                        | T. Kuznetsova |
| M21    | LDR-P73             | Bolshoy Lyakhovskiy<br>Island, Russia | Lena Delta Reserve                                      | 0.2                              | 15                       | 143.6      | 73.21     | OXA-19609                                      | >58,000             | I. Mikolauskas              | 2001                        | T. Kuznetsova |
| M25    | F-0299              | Bolshaya Chuokhya<br>River, Russia    | Ice Age Museum                                          | 5.2                              | 30                       | 157.7      | 69.79     | OXA-19610                                      | 59,300 ± 2,700      | F. Shidlovskiy              | 2003                        | A. Sher       |

1. Iacumin P, Davanzo S, Nikolaev V (2006) Spatial and temporal variations in the <sup>13</sup>C/<sup>12</sup>C and <sup>15</sup>N/<sup>14</sup>N ratios of mammoth hairs: Palaeodiet and palaeoclimatic implications. *Chem Geol* 231:16–28.  
 2. Aptroot A, van Geel B (2006) Fungi of the colon of the Yukagir Mammoth and from stratigraphically related permafrost samples. *Rev Palaeobot Palynol* 141:225–230.

**Table S2. Primers and regions PCR amplified and sequenced for specimen M25 to confirm SNPs that differ from the Krause reference mammoth**

| Primer set | Forward primer 5' → 3'      | First base of F primer* | Reverse primer 5' → 3'     | Amplicon size | Annealing temperature |
|------------|-----------------------------|-------------------------|----------------------------|---------------|-----------------------|
| 1          | TGTAGCTTAAAAAAAAGCAAGG      | 6                       | GGCGAGACGTCATGAGCTAC       | 215           | 60                    |
| 3          | GACGGTCAAAGATGGGCTAC        | 775                     | AATCTGTAATGATTGTTTGATGTGG  | 191           | 60                    |
| 4          | AGTACCGCAAGGGAATGATG        | 1212                    | GGCTCGATTGGTATTTCCACC      | 225           | 60                    |
| 6          | GATCGGATGCCCACTGATAG        | 1782                    | GGCCGTTTAACTTGGTCA         | 221           | 60                    |
| 7          | TAACAATTTTGGTTGGGGTGA       | 2235                    | TCGAGGTCGTAACCCTGCT        | 190           | 60                    |
| 8          | AGCCGCTATTAAGGGTTCGT        | 2452                    | CTGTTCTGGATTGGGTGGT        | 210           | 60                    |
| 9          | GCAGTAGCCTTCCTCACCTT        | 2786                    | TCAGACTTGATATTGCGAGAATAAAA | 289           | 60                    |
| 10         | ACCATATCCCCTAATTAACCTAAATCT | 3013                    | GGTTAGTGTAAGGACCCATTATT    | 217           | 60                    |
| 13         | AGACAACCAATCCACGATCC        | 4042                    | TGGTGCTAATTTTGTGAGGTT      | 278           | 60                    |
| 14         | GGAATGATCTTATAAACCCTGACAAAA | 4284                    | TGAAGTTGTGAGGGTATTGTCT     | 300           | 60                    |
| 15         | TCCCTAACTAATATGAAACAAAAACA  | 4590                    | AGATAGGGTGATTAGAGTCGGTAA   | 315           | 60                    |
| 17         | TCTTGAGACGACCAAAATCT        | 5471                    | TGCTGTCCCAGCTTCTACT        | 230           | 60                    |
| 18         | CACCTTGACAGGATATCCTCTATT    | 5781                    | CCTGCAGGGTCAAAGAAAAGT      | 221           | 60                    |
| 19         | CTACCCTTCATGGCGGTAATA       | 6304                    | GAATTTTGGCTCATGTATGGTTT    | 264           | 60                    |
| 20         | TTTATCGGTGTTAATTTGACATTCTT  | 6582                    | CGTTTGTGTTGTGAGTTCTATCA    | 223           | 60                    |
| 21         | CAAGCCAACTCTATAACCTTTATGC   | 6911                    | TGGACGTTTATTATTTGTGTGGA    | 286           | 60                    |
| 22         | TCCACACAAATATAATAAACGTCCA   | 7172                    | AGCTCCAGAATCATTGGTGTC      | 171           | 60                    |
| 23         | CCTACAGATCTCCAGTTCCG        | 7453                    | TGCTGACCAGCTTTCAAAGTA      | 240           | 60                    |
| 24         | TCTCCTTAATGAATGGAACGAA      | 7762                    | TCGAAGAAGGCGGATAGTTC       | 202           | 60                    |
| 25         | TCCAACCTCAAATCGCCTAA        | 8015                    | TTTATATCGGAAGCCAGGA        | 268           | 60                    |
| 26         | TCACCAAACACATGCCTATCA       | 8608                    | AAAAGGCTCAGAAGAAACCTG      | 299           | 60                    |
| 27         | CAGGTTTCTTCTGAGCCTTTTA      | 8886                    | GCCATAGATACCGTCGGAGA       | 299           | 60                    |
| 28         | ACCTGAGCTCATCACAGCTTAAT     | 9035                    | ACGTCTACGAAATGTCAATATCAA   | 308           | 60                    |
| 29         | CATTTACTGATGAGGATCCTATTTCTT | 9367                    | GCGATTTCTAGGTCAAATAGGAGA   | 299           | 60                    |
| 30         | TTTACCCTGAGCTATCCAAGC       | 9678                    | ATTGAGGGATAATAGTGCATTTAAG  | 346           | 60                    |
| 31         | TGTTTACCTTAAATGCACTATTATCC  | 9992                    | GGCTAGTTAGACTAATTGCGAAGC   | 287           | 60                    |
| 32         | CCTCCGGATCAACTTTTCAG        | 10417                   | AATGGATTTGGCTAGGTATGG      | 305           | 60                    |
| 33         | GGATCTCTCCCCTACTAGTAACC     | 10629                   | AAGGCTATGTGGCTGACTGAA      | 422           | 60                    |
| 34         | CCATGGCCTAACTTCCTCAA        | 11117                   | TGTTCTCTCGGGTAAATGAAGG     | 350           | 60                    |
| 35         | TTTACCCGAGAGAACACCTTG       | 11451                   | GAAAGCCACATTGTTAGATGAGG    | 216           | 60                    |
| 36         | TCAACCCAATCTCAACCCTA        | 11741                   | CTGTTTCGTCCTGCCATC         | 486           | 60                    |
| 37         | ACGGACGAACAGACGTAAC         | 12215                   | TGATGGAAGTCACGGATGAA       | 230           | 60                    |
| 38         | ACCCTCATCCGCTTTTATCC        | 12514                   | GCTGTTGAAGTAATGGGTATTGTTT  | 341           | 60                    |
| 39         | GGTTTTACTCAAAGACCCAATTAT    | 12902                   | CGGAATAGTATTTATTGAGATGAAGA | 260           | 60                    |
| 40         | CGCATACAACACCCCAAATA        | 13160                   | GGCTTAGGTAGGGCAGGATT       | 204           | 60                    |
| 41         | CCAAAACCTCCCTTCAACAAAG      | 13675                   | GGGGGATCTTTCTTGGGTCT       | 260           | 60                    |
| 42         | CCACTATCATCCCACCGAAA        | 13877                   | TGGTAGGAGTCCATGTAGAGGT     | 220           | 60                    |
| 43         | GACTAATGATCTGAAAAACCATCG    | 14097                   | TGCTCCGTTTGTAGTGTAGTTG     | 315           | 60                    |
| 44         | CCTACCTATACTCGGAAACCTGAA    | 14467                   | AGCCTGTTTCGTGAAGGAAG       | 297           | 60                    |
| 45         | ACCTTCCTCACGAAACAGG         | 14742                   | ATCGTAGGATGGCGTAAGCA       | 256           | 60                    |
| 46         | CCTAGCCCTACTCCTATCAATCC     | 15023                   | GGGTTACTTAATGAGGTAGTTTTCCG | 268           | 60                    |
| 47         | GGTATTCAGGGAAGAGGTCCA       | 15349                   | CACGAATATGACTTGACACATTGA   | 255           | 60                    |
| 49         | CCATCTTCGTGTCCTCTTC         | 15784                   | ACCAAATGCATGACACCACA       | 200           | 60                    |

\*Numbering with reference to the revised Krause sequence [Krause J, *et al.* (2006) Multiplex amplification of the mammoth mitochondrial genome and the evolution of Elephantidae. *Nature* 439:724–727], GenBank entry DQ188829.2





**Table S4. Structure prediction calculations**

| Gene name   | Parent structure | % sequences similarity to parent | Residues predicted |
|-------------|------------------|----------------------------------|--------------------|
| <i>COX1</i> | 1occA            | 93                               | 1–511              |
| <i>COX2</i> | 1v54B            | 84                               | 2–226              |
| <i>COX3</i> | 1v54C            | 87                               | 3–261              |
| <i>Cytb</i> | 2fyuC            | 78                               | 2–378              |
| <i>ATP8</i> | n.a.             |                                  |                    |
| <i>ATP6</i> | n.a.             |                                  |                    |
| <i>ND1</i>  | n.a.             |                                  |                    |
| <i>ND2</i>  | n.a.             |                                  |                    |
| <i>ND3</i>  | n.a.             |                                  |                    |
| <i>ND4L</i> | n.a.             |                                  |                    |
| <i>ND4</i>  | n.a.             |                                  |                    |
| <i>ND5</i>  | n.a.             |                                  |                    |
| <i>ND6</i>  | n.a.             |                                  |                    |
